# Supplementary material for: Effects of a Healthy Diet on Reducing Symptoms of Premenstrual Syndrome and Improving Quality of Life among Omani Adolescents: A Randomized Controlled Open-Label Trial
Source: MDPI journal article supplement (doi:10.3390/ijerph20247169), 2023-12-12
Supplement: s1 [file s1]

Supplementary Materials

Supplementary Figures:

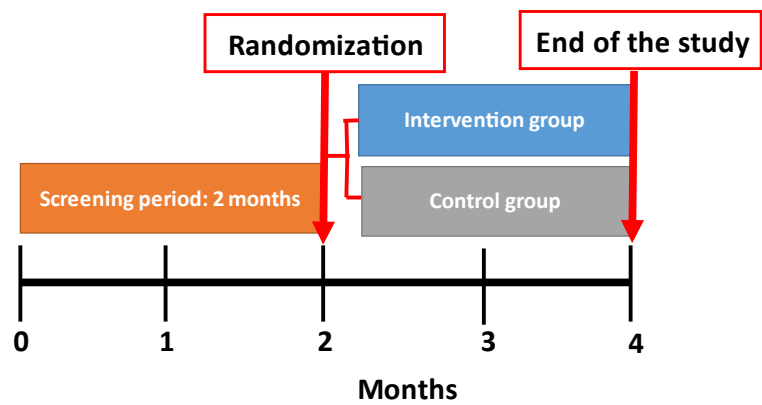

Figure S1. Screening and randomization.

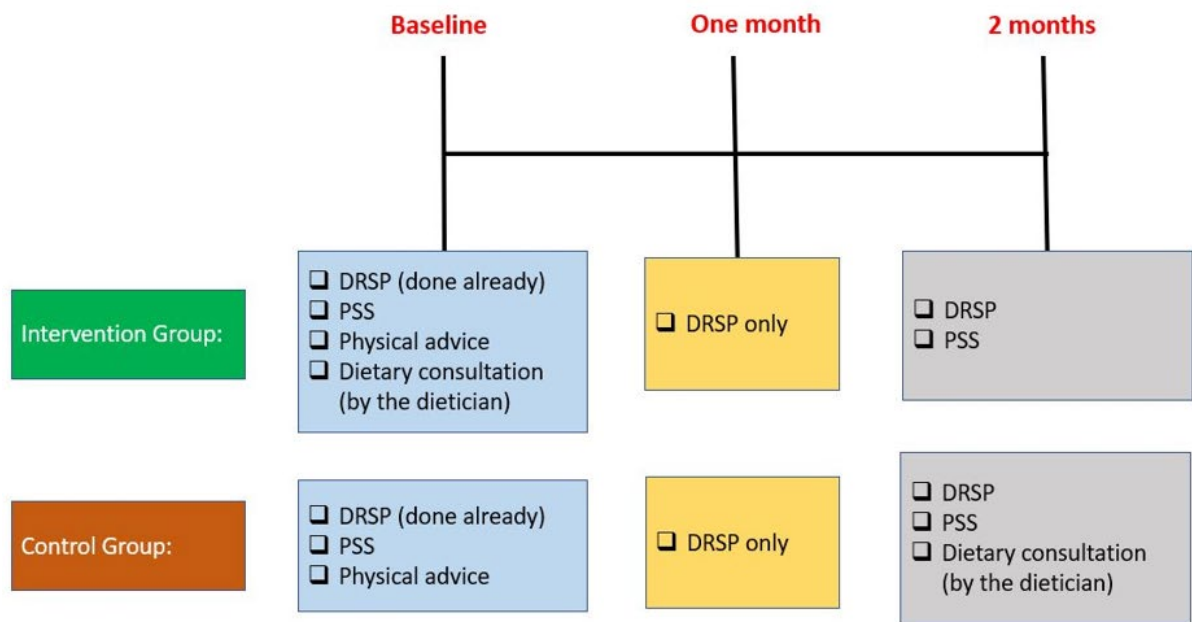

Figure S2. Study procedures and equipment.
